# Supplementary material
Source: HighWire-hosted journal article supplement (https://learnmem.cshlp.org/content/suppl/2023/10/04/30.10.250)
Supplement: Supplemental_Figure_1.docx [file Supplemental_Figure_1.docx]

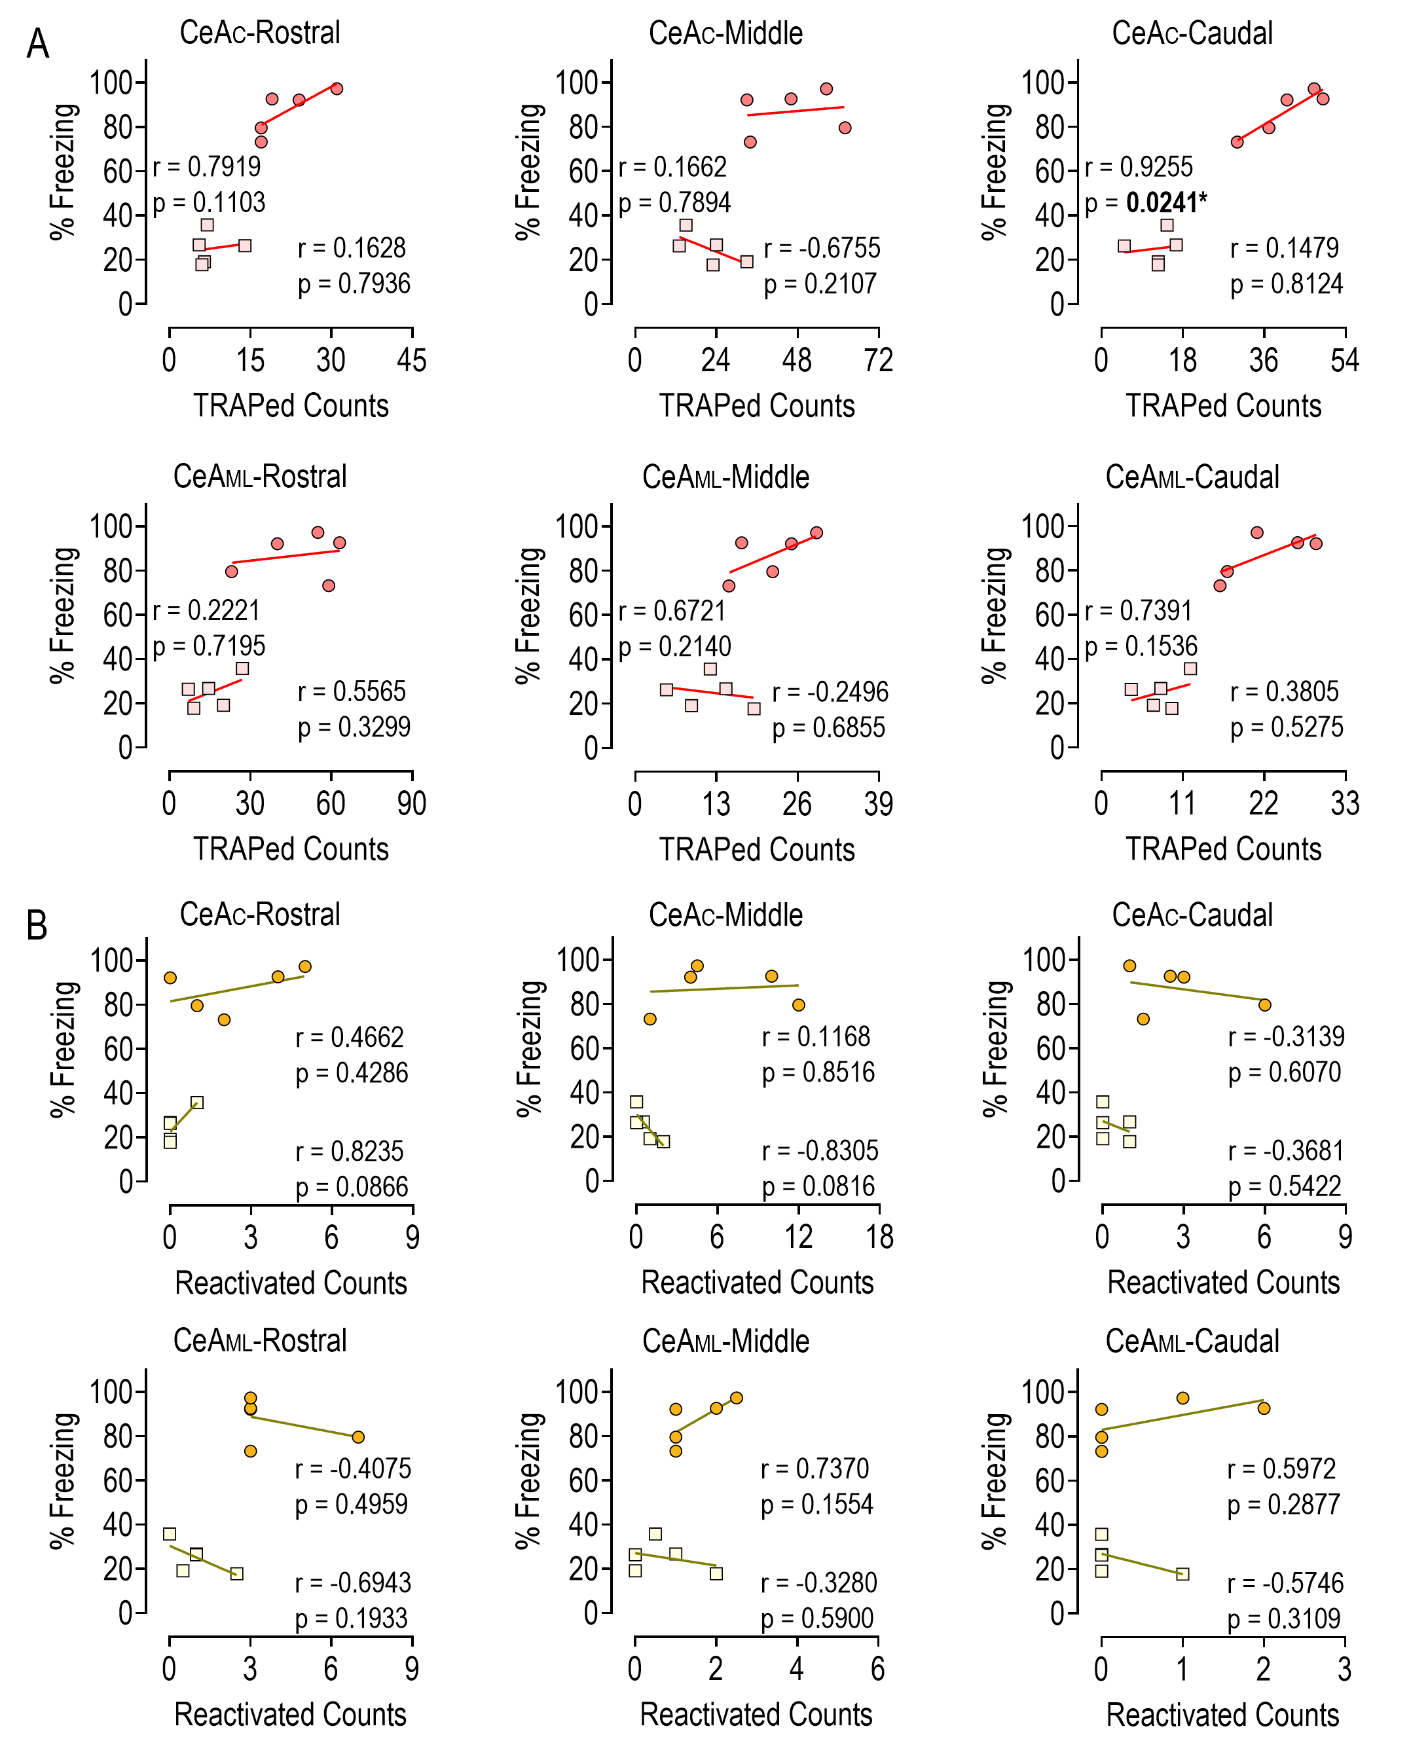


**Supplemental Figure 1: Correlation between remote memory freezing behavior and learning or memory-reactivated ensemble density in subregions of the CeAC**. (**A**) Correlation between amount of time spent freezing during memory recall and tdTomato+ counts in context (squares) and fear (circles) groups in the rostral, middle, and caudal subregions of the CeAC. (**B**) Correlation between amount of time spent freezing during memory recall and dual-labeled counts in context (squares) and fear (circles) groups in the rostral, middle, and caudal subregions of the CeAC. Least squares regression lines are shown along with corresponding Pearson’s coefficients (r). Fisher’s z transformation was applied to compute r’ values comparing the strength of correlations between groups (see **Supplemental Table 2**).
