# Supplementary material
Source: HighWire-hosted journal article supplement (https://learnmem.cshlp.org/content/suppl/2023/10/04/30.10.250)
Supplement: Supplemental_Table_1.docx [file Supplemental_Table_1.docx]

| **Supplemental Table 1: Within treatment group comparison of region-specific ensemble densities in CeA subdivisions.** | | | | | | |
| --- | --- | --- | --- | --- | --- | --- |
| Ensemble Type | Rostral vs. Middle | | Middle vs. Caudal | | Rostral vs. Caudal | |
| Learning  (TdTomato+) | Context | Fear | Context | Fear | Context | Fear |
| Regions | F(2,48)= 3.139, P=0.0524 | | | | | |
| CeAC | 0.0808 | **<0.0001** | 0.9604 | 0.9886 | 0.7808 | **<0.0001** |
| CeAML | 0.9944 | >0.9999 | >0.9999 | 0.9658 | >0.9999 | 0.9788 |
| Recall  (Fos+) |  | | | | | |
| Regions | F(2,48)= 0.05482, P=0.9467 | | | | | |
| CeAC | >0.9999 | >0.9999 | 0.9974 | 0.9985 | >0.9999 | 0.9986 |
| CeAML | >0.9999 | >0.9999 | >0.9999 | 0.9987 | >0.9999 | 0.9148 |
| Reactivated  (Dual-Labelled) |  | | | | | |
| Regions | F(2,48)= 1.760, P=0.1830 | | | | | |
| CeAC | >0.9999 | **0.0200** | >0.9999 | 0.3394 | 0.9834 | 0.9834 |
| CeAML | >0.9999 | >0.9999 | >0.9999 | >0.9999 | >0.9999 | 0.9998 |
| Comparisons of CeA regional count densities within treatment groups and across subregion. P-values represented from three-way ANOVA with Tukey’s post-test. Bold values are statistically significant (P<0.05). CeAC = capsular region, CeAML= combined medial and lateral region. | | | | | | |
