# Supplementary material
Source: HighWire-hosted journal article supplement (https://learnmem.cshlp.org/content/suppl/2023/10/04/30.10.250)
Supplement: Supplemental_Table_2.docx [file Supplemental_Table_2.docx]

| **Supplemental Table 2: Correlation of freezing behavior and Fos ensemble sizes (i.e., counts)** | | | | | | |
| --- | --- | --- | --- | --- | --- | --- |
| **Counts/mm2** | **Figure #** | **Group** | **Pearson’s r** | **P value** | **Fisher’s Z** | **P value** |
| **CeA** | | | | | | |
| tdTomato+ | Figure 2 | Context | -0.0105 | 0.9866 | 1.4214 | 0.1552 |
| Fear | 0.8877 | **0.0444*** |
| Fos+ | Figure 3 | Context | 0.0243 | 0.9691 | 0.1405 | 0.8882 |
| Fear | 0.1633 | 0.7930 |
| tdTomato+  & Fos+ | Figure 4 | Context | -0.0723 | 0.9081 | 0.3459 | 0.7294 |
| Fear | 0.2669 | 0.6693 |
| % tdTomato | Figure 4 | Context | 0.0249 | 0.9682 | 0.1540 | 0.8776 |
| Fear | -0.1284 | 0.8369 |
| % Fos+ | Figure 4 | Context | 0.0091 | 0.9884 | 0.4974 | 0.6189 |
| Fear | 0.4672 | 0.4276 |
| **CeAC** | | | | | | |
| tdTomato+ | Figure 2 | Context | -0.5334 | 0.3546 | 1.4524 | 0.1463 |
| Fear | 0.6950 | 0.1927 |
| Fos+ | Figure 3 | Context | -0.4764 | 0.4172 | 0.8769 | 0.3805 |
| Fear | 0.3440 | 0.5708 |
| tdTomato+  & Fos+ | Figure 4 | Context | -0.4821 | 0.4108 | 0.8135 | 0.4159 |
| Fear | 0.2801 | 0.6481 |
| **CeAC-rostral** | | | | | | |
| tdTomato+ | Supplemental Fig. 1 | Context | 0.1628 | 0.7936 | 0.9122 | 0.3616 |
| Fear | 0.7919 | 0.1130 |
| tdTomato+  & Fos+ | Supplemental Fig. 1 | Context | 0.8235 | 0.0866 | 0.8135 | 0.4159 |
| Fear | 0.4662 | 0.4286 |
| **CeAC-middle** | | | | | | |
| tdTomato+ | Supplemental Fig. 1 | Context | -0.6755 | 0.2107 | 0.9885 | 0.9885 |
| Fear | 0.1662 | 0.7894 |
| tdTomato+  & Fos+ | Supplemental Fig. 1 | Context | 0.8305 | 0.0816 | 0.0614 | 0.9510 |
| Fear | 0.1168 | 0.8516 |
| **CeAC-caudal** | | | | | | |
| tdTomato+ | Supplemental Fig. 1 | Context | 0.1479 | 0.8124 | 1.477 | 0.1397 |
| Fear | 0.9255 | **0.0241*** |
| tdTomato+  & Fos+ | Supplemental Fig. 1 | Context | -0.3139 | 0.6070 | 0.036 | 0.9756 |
| Fear | 0.3681 | 0.5422 |
| **CeAML** | | | | | | |
| tdTomato+ | Figure 2 | Context | 0.3479 | 0.5661 | 0.4204 | 0.6741 |
| Fear | 0.6547 | 0.2305 |
| Fos+ | Figure 3 | Context | 0.3874 | 0.5164 | 0.3772 | 0.7060 |
| Fear | 0.0315 | 0.9600 |
| tdTomato+  & Fos+ | Figure 4 | Context | 0.3353 | 0.5812 | 0.1672 | 0.8672 |
| Fear | 0.1796 | 0.7725 |
| **CeAML-rostral** | | | | | | |
| tdTomato+ | Supplemental Fig. 1 | Context | 0.5565 | 0.3299 | 0.4019 | 0.6877 |
| Fear | 0.2221 | 0.7195 |
| tdTomato+  & Fos+ | Supplemental Fig. 1 | Context | -0.6943 | 0.1933 | 0.4236 | 0.6718 |
| Fear | -0.4075 | 0.4959 |
| **CeAML-middle** | | | | | | |
| tdTomato+ | Supplemental Fig. 1 | Context | -0.2496 | 0.6855 | 1.0695 | 0.2848 |
| Fear | 0.6721 | 0.2140 |
| tdTomato+  & Fos+ | Supplemental Fig. 1 | Context | -0.3280 | 0.5900 | 1.2844 | 0.1990 |
| Fear | 0.7370 | 0.1554 |
| **CeAML-caudal** | | | | | | |
| tdTomato+ | Supplemental Fig. 1 | Context | 0.3805 | 0.5275 | 0.5478 | 0.5838 |
| Fear | 0.7391 | 0.1536 |
| tdTomato+  & Fos+ | Supplemental Fig. 1 | Context | -0.5746 | 0.3109 | 1.3431 | 0.1792 |
| Fear | 0.5972 | 0.2877 |
| Fisher’s z values refer to a Fisher r-to-z transformations comparing correlations across groups. | | | | | | |
